# Supplementary material for: Nutritional Value and Physicochemical Properties of Male and Female Broad-Breasted Bronze Turkey Muscle
Source: MDPI journal article supplement (doi:10.3390/foods13091369), 2024-04-29
Supplement: s1 [file s1]

Table S1. Component composition (g) and nutrient content (g/kg) in feed mixtures for turkeys throughout the entire production cycle (week)

| <b>Component</b>            | <b>1-3</b>   | <b>4-9</b>   | <b>10-13</b> | <b>14-15</b> | <b>16-19</b> | <b>20-25</b> |
|-----------------------------|--------------|--------------|--------------|--------------|--------------|--------------|
| Wheat                       | 493          | 584.35       | 567.42       | 608.04       | 595.32       | 669.65       |
| Barley                      | 30           | 30           | 30           | 30           | 30.00        | 30           |
| Soybean meal                | 355.8        | 249          | 133          | 67           | 0            | 0            |
| Wheat bran                  | 50           | 0            | 114          | 112          | 220          | 220          |
| Sunflower meal              | 0            | 50           | 60           | 80           | 120          | 54           |
| Rapeseed meal               | 0            | 32           | 60           | 70           | 9            | 0            |
| Soybean oil                 | 10           | 10           | 8            | 8            | 0            | 0            |
| Fishmeal                    | 18           | 0            | 0            | 0            | 0            | 0            |
| Monocalcium phosphate       | 10.8         | 6.3          |              | 0            | 0            | 0            |
| Fodder chalk                | 9.4          | 10.8         | 8.1          | 7.8          | 8.5          | 8.4          |
| Dicalcium phosphate         | 6            | 8            | 7            | 4            | 2.5          | 3.9          |
| Avum hemoglobin             | 0            | 5            | 0            | 0            | 0            | 0            |
| L-Lysine SO4                | 0            | 0            | 0            | 0            | 3.7          | 0            |
| Mineral and vitamin premix  | 17           | 14.55        | 12.48        | 13.16        | 10.98        | 14.05        |
| <b>TOTAL (kg)</b>           | <b>1 000</b> | <b>1 000</b> | <b>1 000</b> | <b>1 000</b> | <b>1000</b>  | <b>1 000</b> |
| <b>Chemical composition</b> |              |              |              |              |              |              |
| Crude ash                   | 70.44        | 62.18        | 52.96        | 47.68        | 46.89        | 44.55        |
| Total protein               | 237.9        | 220.0        | 189.9        | 174.9        | 154.9        | 136.0        |
| Total fat                   | 30.84        | 29.14        | 30.33        | 30.74        | 24.94        | 25.23        |
| Crude fiber                 | 32.2         | 37.68        | 47.64        | 50.22        | 55.41        | 45.55        |
| Lysine                      | 12.8         | 11.95        | 9.22         | 8.28         | 7.16         | 6.06         |
| Methionine                  | 4.26         | 4.39         | 3.81         | 3.69         | 3.41         | 2.95         |
| Threonine                   | 9.45         | 7.90         | 6.65         | 6.00         | 4.91         | 4.13         |
| Tryptophan                  | 3.14         | 2.86         | 2.45         | 2.21         | 1.90         | 1.68         |
| Calcium                     | 12.02        | 9.49         | 7.09         | 6.19         | 5.60         | 5.60         |
| Total phosphorus            | 8.89         | 7.09         | 6.18         | 5.62         | 5.69         | 5.33         |
| Available phosphorus        | 5.10         | 3.70         | 2.50         | 2.10         | 1.90         | 1.91         |
| Sodium                      | 1.24         | 1.27         | 1.31         | 1.30         | 1.35         | 1.33         |
